# Supplementary material
Source: Springer Nature journal article supplement (https://www.springermedizin.de/resource/supplementary/12985_2013_2258_MOESM1_ESM.pdf/9606386)

A

60 99

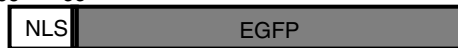

tr|Q87048|SFV 52 L TMRQNAIAPTRFPKPKKKKTTKPKPKTQPKKIKGKTQQQKKKDKQADKKKKKEGKRER 110  
 tr|D9J2W0|CHIKV 51 L TMR--AVPQQ---KPRRNRKNNKQKQKQQAENNTNQKKQPPKKKPAQKKKKEGRRER 104

B

Bright field

Fluorescence

Overlay

EGFP

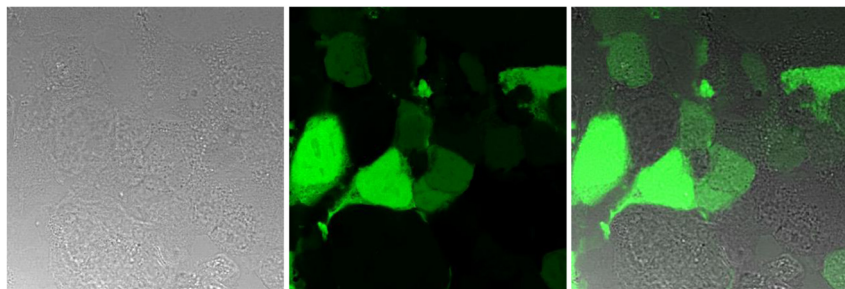

NLS-EGFP

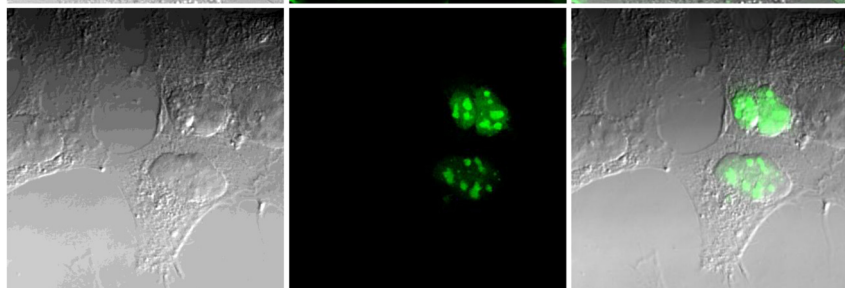

C

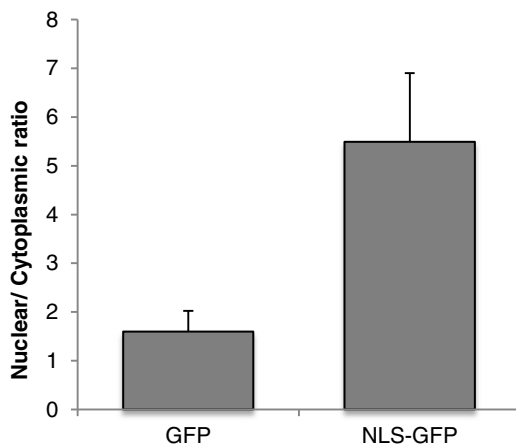

Supplement: MOESM1 [file 9606386]
